# Supplementary material for: Functional outcomes and quality of life after a 6-month early intervention program for oral cancer survivors: a single-arm clinical trial
Source: PeerJ. 2018 Feb 21;6:e4419. doi: 10.7717/peerj.4419 (PMC5827017; doi:10.7717/peerj.4419)
Supplement: Supplemental Information 2 [file peerj-06-4419-s002.xls]

## Sheet: data 1
ID NO	compliance	RT	ND	gender	age	edu	marriage	breadwinner	vocation	left type	right type	bil type	Disease stage	T stage	N stage	M stage	donor site	GH(0)	GH(1)	GH(3)	GH(6)	PF(0)	PF(1)	PF(3)	PF(6)	RF(0)	RF(1)	RF(3)	RF(6)	EF(0)	EF(1)	EF(3)	EF(6)	CF(0)	CF(1)	CF(3)	CF(6)	SF(0)	SF(1)	SF(3)	SF(6)	fati(0)	fati(1)	fati(3)	fati(6)	naus(0)	naus(1)	naus(3)	naus(6)
1	1	1	3	1	55	1	1	0	9	1			4	4	1	0	3		41.6667	50	44.4444	66.6667	80	88.8889	84.4444	66.6667	50	88.8889	77.7778	66.6667	91.6667	97.2222	80.5556	66.6667	66.6667	83.3333	72.2222	66.6667	100	100	83.3333	33.3333	22.2222	18.5185	22.2222	33.3333	0	11.1111	0
2	2	1	2	1	41	2	1	1	2	1			4	2	2	0	0	25		45.8333	66.6667	73.3333		63.3333	86.6667	0		50	75	50		58.3333	70.8333	83.3333		91.6667	100	33.3333		33.3333	66.6667	55.5556		50	16.6667	33.3333		33.3333	16.6667
3	2	1	1	0	71	0	1	0	0		2		4	2	2	0	1	0	16.6667	50		33.3333	0	60		0	33.3333	50		16.6667	33.3333	41.6667		16.6667	66.6667	75		0	33.3333	50		55.5556	22.2222	38.8889		33.3333	0	0
4	2	1	3	1	51	1	1	1	3	1			4	4	2	0	0	33.3333				33.3333				0				91.6667				83.3333				33.3333				55.5556				16.6667
5	2	1	1	1	44	1	1	1	1		1		2	2	0	0	0	0			58.3333	20			62.2222	0			94.4444	91.6667			52.7778	33.3333			27.7778	33.3333			50	44.4444			29.6296	0			11.1111
6	1	0	2	1	66	1	1	0	0	3			2	2	0	0	0	0	33.3333	33.3333	44.4444	46.6667	73.3333	75.5556	73.3333	16.6667	66.6667	50	50	33.3333	66.6667	36.1111	38.8889	16.6667	83.3333	50	50	83.3333	66.6667	38.8889	44.4444	88.8889	33.3333	62.963	59.2593	33.3333	0	5.55556	38.8889
7	2	1	2	1	67	1	2	0	5	0			2	2	0	0	0	0				26.6667				33.3333				75				50				50				66.6667				50
8	2	1	2	1	49	0	1	1	9	0			4	2	2	0	0	66.6667		66.6667		80		93.3333		66.6667		83.3333		75		66.6667		66.6667		83.3333		66.6667		83.3333		33.3333		33.3333		0		16.6667
9	1	1	3	1	52	1	1	1	9			4	4	4	3	0	0	0	66.6667	58.3333	37.5	20	100	86.6667	86.6667	0	66.6667	44.4444	50	66.6667	66.6667	63.8889	54.1667	66.6667	83.3333	66.6667	66.6667	0	50	50	50	88.8889	33.3333	29.6296	50	0	33.3333	11.1111	8.33333
10	2	1	3	1	54	1	2	0	9	3		5	4	4	2	0	0	50				40				0				75				83.3333				50				66.6667				0
11	2		1	1	46	1	1	1	8		0		2	2	0	0	0	100				53.3333				66.6667				66.6667				100				16.6667				55.5556				50
12	1	0	3	1	54	0	2	1	1	0			3	2	2	0	0	0	66.6667	66.6667	66.6667	53.3333	73.3333	73.3333	73.3333	66.6667	100	72.2222	66.6667	66.6667	83.3333	77.7778	100	66.6667	66.6667	66.6667	83.3333	66.6667	83.3333	72.2222	66.6667	33.3333	33.3333	25.9259	33.3333	0	0	0	0
13	1	0	1	1	63	0	1	0	1		0		2	2	0	0	0	41.6667	66.6667	83.3333	83.3333	26.6667	80	84.4444	97.7778	16.6667	83.3333	94.4444	100	58.3333	75	88.8889	97.2222	16.6667	66.6667	83.3333	88.8889	16.6667	83.3333	100	94.4444	77.7778	22.2222	22.2222	0	66.6667	0	0	0
14	2		2	1	41					6			2	2	0	0	6
15	2	1	2	1	58	0	2	0	5	3			4	4	1	0	1	16.6667				86.6667				0				100				66.6667				66.6667				77.7778				0
16	1	1	2	1	61	0	1	0	9	1			3	2	1	0	3	66.6667	50	44.4444	41.6667	73.3333	80	77.7778	63.3333	66.6667	83.3333	72.2222	50	58.3333	58.3333	75	58.3333	83.3333	66.6667	83.3333	66.6667	66.6667	83.3333	66.6667	75	33.3333	33.3333	44.4444	38.8889	0	0	27.7778	0
17	2		2	1	43	0	1	1	9	0			2	2	0	0	0	33.3333				80				83.3333				75				33.3333				66.6667				22.2222				0
18	2	0	2	1	51	2	1	0		3			4	2	2	0	1	33.3333				40				66.6667				41.6667				50				66.6667				33.3333				16.6667
19	2	1	3	1	60	1	1	0	0			2	3	2	1	0	1	100		33.3333		60		53.3333		83.3333		66.6667		100		91.6667		100		100		83.3333		66.6667		0		44.4444		0		0
20	2	0	3	1	34	3	0	0	2	1			4	4	2	0	6	0				100				33.3333				75				83.3333				33.3333				44.4444				0
21	1	1	3	1	59	1	1	0	0	1			4	2	2	0	0	33.3333	25	33.3333		46.6667	86.6667	33.3333		0	83.3333	16.6667		50	100	45.8333		83.3333	83.3333	50		0	33.3333	16.6667		77.7778	33.3333	61.1111		33.3333	0	41.6667
22	2	1	3	1	53	1	1	0	9	6			4	4	2	0	5	8.33333				93.3333				100				83.3333				66.6667				83.3333				33.3333				0
23	2	1	3	1	43	2	1	1	5		1		4	4	1	0	0	50	50	63.8889	66.6667	53.3333	80	73.3333	80	0	33.3333	66.6667	66.6667	75	83.3333	66.6667	70.8333	83.3333	83.3333	66.6667	66.6667	66.6667	50	66.6667	66.6667	33.3333	33.3333	33.3333	27.7778	33.3333	16.6667	11.1111	0
24	1	1	2	1	63	2	2	0	5	0			2	2	0	0	7	0	16.6667	33.3333	29.1667	33.3333	26.6667	33.3333	33.3333	0	33.3333	33.3333	0	33.3333	33.3333	50	25	66.6667	33.3333	33.3333	41.6667	33.3333	83.3333	66.6667	25	55.5556	88.8889	66.6667	72.2222	33.3333	0	0	8.33333
25	1	1	1	1	36	3	1	1	2		9		4	4	0	0	0	50		58.3333	69.4444	80		93.3333	100	0		100	100	100		100	100	100		100	100	66.6667		75	94.4444	33.3333		27.7778	0	0		0	0
26	2	0	1	1	57	2	1	0	5		0		4	4	2	0	0	33.3333	33.3333			93.3333	86.6667			100	83.3333			91.6667	75			83.3333	100			66.6667	66.6667			33.3333	33.3333			0	0
27	2	0	1	1	36	3	1	1	2		6		4	4	0	0	0	50				80				83.3333				75				83.3333				66.6667				22.2222				0
28	1	0	1	1	49	2	1	1	9		0		2	2	0	0	0	66.6667	66.6667	69.4444		66.6667	60	84.4444		66.6667	66.6667	72.2222		66.6667	91.6667	66.6667		83.3333	83.3333	66.6667		66.6667	50	66.6667		44.4444	11.1111	33.3333		0	0	0
29	1	0	2	1	65	1	1	0	0	1			3	3	0	0	4	0		38.8889	50	60		68.8889	86.6667	16.6667		33.3333	66.6667	66.6667		27.7778	50	50		22.2222	50	33.3333		16.6667	33.3333	77.7778		51.8519	33.3333	66.6667		33.3333	0
30	1	1	1	1	50	1	1	1	8		2		2	2	0	0	0	0	50	44.4444	50	86.6667	66.6667	68.8889	83.3333	100	66.6667	55.5556	58.3333	75	66.6667	41.6667	41.6667	83.3333	100	55.5556	33.3333	50	33.3333	38.8889	58.3333	22.2222	33.3333	33.3333	33.3333	0	0	5.55556	0
31	1	1	3	1	44	2	1	1	1	5			4	3	2	0	1	41.6667	50	41.6667	66.6667	46.6667	73.3333	83.3333	80	66.6667	50	58.3333	61.1111	66.6667	66.6667	66.6667	72.2222	83.3333	83.3333	66.6667	83.3333	66.6667	66.6667	66.6667	66.6667	33.3333	33.3333	33.3333	22.2222	16.6667	0	0	0
32	2	1	3	1	64	3	1	1	9		0		4	4	2	0	3	33.3333	83.3333			73.3333	100			50	66.6667			91.6667	91.6667			100	100			16.6667	66.6667			44.4444	0			0	0
33	1	0	1	0	55	1	1	0	9		3		1	1	0	0	0	66.6667	50	47.2222	44.4444	33.3333	60	62.2222	64.4444	0	33.3333	50	33.3333	100	91.6667	66.6667	66.6667	66.6667	66.6667	66.6667	72.2222	50	33.3333	66.6667	66.6667	44.4444	44.4444	44.4444	51.8519	33.3333	0	0	0
34	1	0	2	1	50	2	1	1	1	1			2	2	0	0	0	41.6667	83.3333	100	100	66.6667	93.3333	100	100	33.3333	66.6667	91.6667	100	83.3333	91.6667	100	100	66.6667	100	100	100	50	66.6667	91.6667	100	55.5556	33.3333	0	0	33.3333	0	0	0
35	2	0	2	1	45	2	1	1	9			4	4	4	0	0	0	16.6667		75		20		93.3333		0		100		91.6667		91.6667		100		66.6667		33.3333		83.3333		44.4444		22.2222		0		0
36	1	0	1	1	44	3	1	1	2		3		2	2	0	0	1	41.6667	66.6667	88.8889	83.3333	20	80	97.7778	100	33.3333	33.3333	100	100	75	100	100	100	83.3333	100	100	100	66.6667	66.6667	100	100	55.5556	22.2222	0	0	0	0	0	0
37	2	0	1	1	50	1	1	1	9		0		2	2	0	0	0	16.6667		58.3333		46.6667		80		50		66.6667		75		66.6667		83.3333		100		50		50		33.3333		22.2222		0		16.6667
38	1	0	2	1	66	1	1	0	8	0			1	1	0	0	0	100		66.6667		100		93.3333		100		94.4444		83.3333		86.1111		83.3333		77.7778		66.6667		72.2222		33.3333		33.3333		0		0
39	1	1	3	1	58	1	1	1	9	1			4	4	2	0	10	66.6667	66.6667	33.3333		86.6667	100	100		100	100	100		91.6667	100	91.6667		50	100	100		0	66.6667	100		11.1111	22.2222	33.3333		0	0	0
40	1	1	1	0	37	2	0	1	9		0		4	4	0	0	0	33.3333	66.6667	66.6667	66.6667	93.3333	93.3333	96.6667	100	0	0	83.3333	100	83.3333	100	100	100	100	66.6667	100	100	0	83.3333	100	100	11.1111	33.3333	16.6667	0	0	0	16.6667	0
41	1	1	3	1	36	2	1	1	1		1		4	4	2	0	5	100	100	91.6667		80	93.3333	100		33.3333	100	100		100	100	100		100	100	100		100	100	100		0	0	0		16.6667	0	0
42	2	1	3	1	49	2	1	1	8	1			2	2	0	0	3	0	66.6667			73.3333	100			0	100			91.6667	91.6667			83.3333	100			16.6667	50			33.3333	33.3333			0	0
43	2	1	2	1	25	3	0	0	0	6			4	4	1	0	1	16.6667	33.3333			26.6667	60			66.6667	33.3333			91.6667	83.3333			66.6667	100			33.3333	33.3333			66.6667	33.3333			33.3333	33.3333
44	1	1	2	1	59	2	1	0	9		3		1	1	0	0	0	16.6667	25	52.7778	50	33.3333	80	75.5556	86.6667	0	33.3333	61.1111	83.3333	25	33.3333	55.5556	50	50	50	66.6667	66.6667	33.3333	50	61.1111	58.3333	44.4444	22.2222	25.9259	11.1111	16.6667	0	5.55556	0
45	1	1	1	1	55	1	2	1	0		3		4	4	1	0	1	66.6667	66.6667	66.6667		46.6667	80	83.3333		33.3333	100	100		66.6667	83.3333	87.5		83.3333	100	100		33.3333	83.3333	83.3333		11.1111	11.1111	5.55556		16.6667	0	0
46	1	0	2	1	61	1	1	1	1	6			1	1	0	0	8	50		66.6667		80		90		83.3333		83.3333		91.6667		91.6667		83.3333		100		100		100		22.2222		22.2222		0		0
47	2	0	3	1	65	2	2	1	8	1			2	2	0	0	0	33.3333				40				83.3333				91.6667				83.3333				50				88.8889				0
48	2	0	1	1	48	1	2	1	5		6		4	2	2	0	9	50				26.6667				0				66.6667				83.3333				66.6667				55.5556				33.3333
49	2	0	2	1	42	2	0	1	0		7		4	2	2	0	3	50				93.3333				66.6667				88.8889				100				83.3333				22.2222				0
50	2	0	2	0	41	1	1	1	2	3			4	4	0	0	1	66.6667				46.6667				83.3333				58.3333				66.6667				66.6667				44.4444				0
51	2	1	1	1	46	3	1	1	3		1		4	2	2	0	0	0	50			66.6667	80			50	66.6667			33.3333	58.3333			33.3333	66.6667			33.3333	33.3333			66.6667	55.5556			33.3333	100
52	1	1	1	1	54	1	0		9		0		3	3	0	0	0		33.3333	20.8333		60	93.3333	100		83.3333	100	100			100	100			100	100			100	91.6667		50	22.2222	11.1111		0	0	0
53	1	1	1	1	54	2	1	1	9		6		3	2	1	0	0	0	83.3333	44.4444	33.3333	66.6667	73.3333	77.7778	80	66.6667	66.6667	66.6667	33.3333	66.6667	58.3333	66.6667	66.6667	66.6667	66.6667	66.6667	66.6667	66.6667	66.6667	66.6667	33.3333	22.2222	22.2222	29.6296	55.5556	0	16.6667	11.1111	16.6667
54	1	0	2	1	48	2	1	1	1	0			2	2	0	0	0	16.6667	83.3333	91.6667	95.8333	93.3333	100	100	100	66.6667	100	100	100	66.6667	100	100	100	83.3333	83.3333	100	100	66.6667	100	100	100	33.3333	22.2222	11.1111	0	0	0	0	0
55	2	0	1	1	20	2	0	0	0		9		1	1	0	0	7	50				100				100				83.3333				83.3333				100				33.3333				16.6667
56	1	1	1	1	65	1	1	1	1		0		4	4	2	0	0	50	33.3333	22.2222	41.6667	33.3333	73.3333	77.7778	73.3333	0	66.6667	66.6667	66.6667	75	66.6667	61.1111	66.6667	100	83.3333	66.6667	66.6667	66.6667	66.6667	50	66.6667	44.4444	33.3333	33.3333	33.3333	0	0	16.6667	0
57	2	1	1	1	56	2	1	1	9	3	7		4	2	2	0	0	25	50	33.3333		46.6667	33.3333	33.3333		16.6667	0	0		16.6667	50	41.6667		66.6667	100	83.3333		0	0	0		77.7778	55.5556	66.6667		33.3333	0	33.3333
58	2	0	1	1	34	2	0	0	2		0		4	4	2	0	2	66.6667				100				33.3333				66.6667				83.3333				50				33.3333				0
59	2	0	1	1	59	1	1	1	1		0		4	4	0	0	0	58.3333				73.3333				100				75				100				66.6667				22.2222				0
60	1	0	2	1	45	1	1	1	2	10			1	1	0	0	0	50	66.6667	61.1111	66.6667	73.3333	80	86.6667	90	33.3333	66.6667	66.6667	100	66.6667	75	69.4444	83.3333	66.6667	66.6667	77.7778	83.3333	33.3333	66.6667	66.6667	66.6667	55.5556	33.3333	33.3333	33.3333	0	0	0	0
61	2	0	1	1	45	1	0	1	9		0		2	2	0	0	0	33.3333				93.3333				100				100				100				66.6667				0				0
62	1	1	3	1	50	2	1	1	5			1	4	4	0	0	0	33.3333	41.6667	58.3333		46.6667	46.6667	60		0	33.3333	50		58.3333	66.6667	70.8333		83.3333	66.6667	83.3333		16.6667	33.3333	50		33.3333	44.4444	38.8889		0	33.3333	16.6667
63	2	0	1	1	50	2	1	1	9		1		4	3	2	0	0	8.33333	33.3333			73.3333	80			66.6667	66.6667			66.6667	91.6667			66.6667	66.6667			66.6667	66.6667			44.4444	44.4444			0	0
64	1	0	2	1	57	1	1	1	9	0			2	2	0	0	0	0	33.3333	83.3333		100	86.6667	93.3333		83.3333	83.3333	100		50	66.6667	75		66.6667	66.6667	66.6667		33.3333	83.3333	83.3333		44.4444	33.3333	11.1111		16.6667	0	0
65	2	1	3	1	35	2	0	0	8		1		4	4	2	0	3	66.6667	58.3333			93.3333	100			100	100			75	91.6667			83.3333	100			66.6667	66.6667			0	0			0	0
66	2	1	1	1	65	1	1	1	9		5		3	2	1	0	0	0	58.3333	41.6667		93.3333	73.3333	93.3333		100	83.3333	83.3333		83.3333	100	100		100	83.3333	66.6667		66.6667	66.6667	66.6667		33.3333	22.2222	11.1111		0	0	16.6667
67	2	0	2	1	41	2	1	1	3	0			4	4	0	0	0	83.3333				100				100				83.3333				100				100				0				0
68	2		2	1	60	1	1	0	9	1			3	3	0	0	0	25				60				100				66.6667				66.6667				66.6667				44.4444				33.3333
69	1	0	2	1	64	1	1	1	9	3			3	3	0	0	0	25	50			20	73.3333			0	83.3333			16.6667	50			33.3333	83.3333			33.3333	66.6667			100	55.5556			0	16.6667
70	1	1	1	1	46	2	1	1	1	0			4	4	2	0	1	33.3333	33.3333	52.7778	66.6667	33.3333	46.6667	62.2222	66.6667	0	33.3333	50	66.6667	41.6667	66.6667	61.1111	66.6667	33.3333	50	61.1111	50	33.3333	50	61.1111	50	88.8889	44.4444	33.3333	33.3333	16.6667	33.3333	33.3333	33.3333
71	2	0	2	1	48	2	1	1	9	1			2	2	0	0	0	50	66.6667			80	93.3333			83.3333	66.6667			100	91.6667			100	83.3333			100	100			0	22.2222			0	0
72	1	1	2	1	47	3	1	1	3	5			2	2	0	0	2	16.6667	66.6667	80.5556	75	86.6667	93.3333	97.7778	96.6667	0	66.6667	77.7778	66.6667	50	75	77.7778	66.6667	66.6667	100	100	91.6667	0	33.3333	55.5556	41.6667	77.7778	33.3333	0	0	0	0	0	0
73	2	1	2	1	48	2	1	1	9	0			4	2	2	0	3	33.3333				60				66.6667				50				50				66.6667				88.8889				33.3333
74	1	1	1	1	64		1	1	0		2		4	4	0	0	1	100	100	33.3333		53.3333	73.3333	80		100	66.6667	100		83.3333	100	100		100	100	100		100	100	91.6667		11.1111	22.2222	38.8889		0	0	33.3333
75	1	1	1	1	38	2	2	1	1		2		4	4	2	0	1	33.3333	58.3333			0	73.3333			0	33.3333			66.6667	75			66.6667	100			50	66.6667			55.5556	22.2222			0	0
76	1	0	2	1	59	2	1	1	9	0			1	1	0	0	5	33.3333	41.6667	61.1111	75	86.6667	100	100	100	66.6667	100	100	100	100	75	88.8889	70.8333	83.3333	100	100	91.6667	100	66.6667	77.7778	66.6667	22.2222	0	7.40741	5.55556	0	0	0	0
77	2	0	3	1	41	2	2	0	9		3		4	4	2	0	1	33.3333	66.6667			53.3333	80			0	66.6667			75	91.6667			83.3333	83.3333			50	66.6667			44.4444	33.3333			16.6667	33.3333
78	2	0	1	1	44	2	2	1	5		2		2	2	0	0	0	50	16.6667			73.3333	73.3333			100	83.3333			33.3333	58.3333			66.6667	50			66.6667	66.6667			77.7778	33.3333			66.6667	33.3333
79	1	0	2	1	45	2	1	1	9	0			2	2	0	0	0	50				80				83.3333				66.6667				83.3333				66.6667				33.3333				16.6667
80	1	1	2	0	43	3	0	0	2	1			2	2	0	0	0	33.3333	75	61.1111	100	80	73.3333	100	100	66.6667	66.6667	100	100	75	100	100	100	83.3333	100	100	100	66.6667	66.6667	88.8889	100	33.3333	33.3333	3.7037	0	16.6667	0	5.55556	0
81	2	0	1	1	47	2	2	1	9		6		3	1	1	0	0	33.3333				73.3333				100				75				66.6667				66.6667				33.3333				0
82	1	0	2	1	57	1	1	1	1	0			3	3	0	0	0	8.33333	66.6667	75	75	93.3333	86.6667	93.3333	93.3333	100	83.3333	100	100	91.6667	83.3333	83.3333	83.3333	100	83.3333	100	91.6667	66.6667	50	75	75	11.1111	11.1111	9.25926	16.6667	33.3333	33.3333	5.55556	0
83	2	0	2	1	46	2	2	1	5	5			4	2	2	0	0	50				93.3333				66.6667				100				100				66.6667				11.1111				0
84	2		2	1	58	2	1	1	1	2			3	3	0	0	0	66.6667	66.6667			93.3333	100			66.6667	100			75	83.3333			66.6667	66.6667			66.6667	66.6667			33.3333	33.3333			33.3333	0
85	1	0	1	0	25	3	0	0	5		1		1	1	0	0	3	58.3333		80.5556	91.6667	80		95.5556	100	50		83.3333	100	66.6667		94.4444	95.8333	100		100	100	33.3333		100	100	11.1111		11.1111	11.1111	0		0	0
86	1	0	1	1	44	3	1	1	9		0		2	2	0	0	0	33.3333	66.6667	50	50	80	86.6667	91.1111	93.3333	66.6667	66.6667	77.7778	100	83.3333	66.6667	80.5556	91.6667	83.3333	83.3333	83.3333	100	66.6667	66.6667	66.6667	83.3333	33.3333	33.3333	33.3333	33.3333	0	0	0	0
87	1	0	2	1	31	2	0	0	1	6			1	1	0	0	0	0	50	50		60	80	80		0	66.6667	66.6667		0	58.3333	41.6667		33.3333	66.6667	66.6667		33.3333	66.6667	66.6667		88.8889	33.3333	44.4444		66.6667	16.6667	33.3333
88	2	0	3	1	52	1	1	1	8		0		2	2	0	0	0	50				80				33.3333				83.3333				66.6667				100				55.5556				0
89	1	1	3	1	59	2	1	1	9	1			4	4	2	0	3	0	33.3333	44.4444	45.8333	40	86.6667	82.2222	70	83.3333	100	44.4444	66.6667	75	66.6667	75	70.8333	83.3333	83.3333	77.7778	66.6667	0	66.6667	61.1111	50	66.6667	33.3333	29.6296	33.3333	16.6667	50	38.8889	25
90	2	0	1	1	63	1	1	1			0		1	1	0	0	0	75				73.3333				100				66.6667				83.3333				66.6667				33.3333				0
91	2	0	1	1	59	1	2	0			6		1	1	0	0	0	33.3333				60				100				41.6667				66.6667				50				33.3333				66.6667
92	1	1	2	1	44	2	0	0	2	3			4	4	2	0	1	33.3333				53.3333				0				66.6667				83.3333				66.6667				22.2222				0
93	1	1	2	1	56	1	2	1		6			4	4	2	0	0	16.6667				80				100				83.3333				66.6667				66.6667				44.4444				16.6667
94	2	1	2	1	57	1	1	1		1,3			4	4	2	0	0	41.6667				73.3333				66.6667				75				66.6667				16.6667				33.3333				33.3333
95	2	1	2	1	57	2	1	0	3	0			4	3	2	0	0	16.6667				53.3333				16.6667				25				83.3333				66.6667				66.6667				33.3333
96	1	0	1	1	42	1	2	1	3		0		2	2	0	0	3	33.3333		36.1111	16.6667	86.6667		82.2222	60	16.6667		66.6667	33.3333	41.6667		61.1111	66.6667	66.6667		72.2222	66.6667	33.3333		72.2222	50	55.5556		62.963	55.5556	16.6667		5.55556	33.3333
97	1	1	2	1	50	2	1	1	1	0			2	2	0	0	0	0	58.3333	50		73.3333	93.3333	86.6667		66.6667	83.3333	66.6667		66.6667	75	75		83.3333	66.6667	83.3333		33.3333	33.3333	50		11.1111	44.4444	22.2222		0	0	50
98	1	0	2	1	60	2	1	0	1	0			2	2	0	0	0	83.3333	83.3333	100	100	93.3333	80	100	100	100	100	100	100	100	100	100	100	100	100	100	100	100	100	100	100	11.1111	22.2222	0	0	0	0	0	0
[truncated: 122 more columns]

## Sheet: data 2
ID NO	IID(0)	IID(1)	IID(3)	IID(6)	MMO(0)	MMO(1)	MMO(3)	MMO(6)	Lflex(0)	Rflex(0)	Lflex(1)	Rflex(1)	Lflex(3)	Rflex(3)	Lflex(6)	Rflex(6)	Labd(0)	Rabd(0)	Labd(1)	Rabd(1)	Labd(3)	Rabd(3)	Labd(6)	Rabd(6)	LIR(0)	RIR(0)	LIR(1)	RIR(1)	LIR(2)	RIR(2)	LIR(3)	RIR(3)	LIR(4)	RIR(4)	LIR(6)	RIR(6)	LER(0)	RER(0)	LER(1)	RER(1)	LER(3)	RER(3)	LER(6)	RER(6)	LMT(1)	RMT(1)	LMT(3)	RMT(3)	LMT(6)
1	25	31	33	37.6667		35	36.6667	39.3333					155	165	155	165					150	160	160	170	50	50	90	90	80	70	60	50	65	60	70	60	90	90	90	90	80	80	90	90	2	2	4	3	4
2	19		30	22			24.5	27.5					150	170	140	160					150	170	150	170	90	90					70	80			60	60	90	90			70	80	80	80			4	4	4
3	19	24			20	20	30		180	170	180	180	180	160											75	75	80	80	90	70	90	75					90	90	80	80	90	75					4	4
4	15				16				180	180															80	50											90	90
5				21.5	15			15.5							140	170							180	180	80	30									80	80	45	80					80	80					4
6				39	25	25	41.6667	30					150	160	150	160					150	170	160	160	90	45	90	70	90	70	70	50			75	60	90	90	90	90	70	80	80	90	4	5	4	4	5
7					30				170	180															90	90											75	70
8	22		14		30		20		170	170			180	180											70	70			90	90							90	90									2	3
9	34	37	37.3333	38	35	35	34	40					120	165	110	160					100	165	90	170	80	80	90	75	80	75	70	65			80	90	80	80	90	90	80	85	60	75	4	4	4	4	5
10					25				180	180															50	70											90	90
11	23				20				180	170															80	80											80	80
12			30	41	25		38.3333	25					160	165	170	170					175	175	175	175	70	80	85	80	90	80	50	60			50	60	40	90	40	80	40	80	50	80	4	4	4	4	5
13	16	10	6.33333	11.3333	15	10	18.3333	14.3333					160	160	160	160					175	165	170	170	80	80	90	90	90	90	70	70	70	70	60	60	80	80	90	90	80	80	90	80	5	5	5	5	5
14
15	17				15				180	180															90	70											90	90
16	34	24	26.6667	34.5	35	30	25	30.5					165	160	160	165					160	175	170	170	80	70	90	75	90	75	70	70			70	70	80	90	80	90	70	85	70	80	4	4	4	5	5
17	15				15				180	180															90	90											90	90
18									170	180															90	75											90	90
19							25		180	180			110	130											90	90					80	80					90	90			80	80
20	18				40				180	180															90	90											90	90
21	25	25	20		15	25	16		180	180			160	165					180	180	165	165			80	80	80	80			80	70	80	70			80	80	80	80	90	90			5	5	5	5
22					20				170	155															65	60											90	90
23	24	16	10	23.5	10	20	10	23			170	170	180	180	180	180			170	180	180	180	180	180	60	90	60	80	60	65	80	65	80	60	90	70	90	90	90	90	90	80	90	80	5	5	5	5	5
24	18	18	32	32	25	25	30	35			150	165	150	165	150	160			150	170	160	170	155	165	65	50	50	50					60	60	60	60	35	60	50	60	60	55	60	50	4	4	4	4	5
25	16		23.5	32.5	20		30	27.5					180	180	180	180					180	180	180	180	85	65			80	70	80	70			70	75	5	5			90	90	90	90			5	5	5
26					10	25			180	160	130	120					180	160	150	100					90	70	80	70									90	90	80	80					4	2
27	24				20				170	165							165	160							75	75											85	85
28	40	30	39.6667		35	30	38.3333		170	170	160	165	160	160			170	170	180	180	175	175			65	60	60	65	65	65	65	60	65	65			90	90	75	75	90	65			5	5	4	4
29	32		40.6667		30		41.6667		135	140			150	150			55	160			150	170			75	80			70	65	70	70	70	75			80	65			70	80					4	4
30		31	37	43.5	30	35	30	39	150	145	170	150	165	155	160	160	170	140	175	125	170	155	170	170	50	70	70	70	70	70	65	50	70	55	75	50	80	80	70	80	90	85	90	80	4	4	4	3	5
31			20	20.5	10	15	12.5	18.3333	145	155	150	165	150	160	150	155	165	165	170	175	165	170	170	170	45	55	80	70			75	65	75	60	75	70	80	80	90	80	90	70	90	50	3	3	4	4	4
32	32	15			35	25			155	160	150	155					150	140	160	140					85	80	85	85									80	75	85	75					5	4
33	22	31	48.6667	51	30	45	45.6667	47.5	165	155	155	155	160	160	160	160	160	125	170	160	170	150	170	155	80	75	65	90	80	85	80	80	85	75	80	80	80	80	90	90	90	90	90	90	5	4	4	4	4
34	31	31	40	42.5	20	45	36.5	43	130	160	120	160	150	165	150	165	130	170	130	170	155	170	165	170			75	65	70	60	75	65			80	75			90	90	80	85	80	85	4	4	4	5	5
35	16		32		33		27		130	150			145	160			130	165			155	170			80	80					80	80					60	80			60	70
36	19	26	38	45	25	35	33.3333	45	170	170	170	170	170	170	175	175	170	160	180	170	170	170	180	180	80	80	80	80	80	80	80	80	80	80	80	85	80	80	80	80	85	80	90	90	5	5	5	5	5
37	20		22		20		30		160	160							170	165							90	90			90	75							90	90			90	90
38	15		31		20		29.6667		150	165			165	170			150	170			155	175			80	65			80	60	80	60	80	60			90	90			90	90					4	5
39	20	32	32		20	30	25		140	150	145	145	150	150			140	150	150	150	145	150			80	70	70	60	80	80							90	90	85	85	90	80			4	4	4	4
40	10	17	16.5	18	16	25	21.5	28	170	170	170	170	170	170	165	165	170	170	180	170	180	180	170	170	90	90	90	90	90	90					70	75	90	90	90	90	90	90	90	90	5	5	5	5	5
41	20	34	25		20	20	20		155	160	150	160	160	165			170	170	160	150	170	170			70	70	85	70	80	75							90	90	85	90	85	90			5	5	5	5
42	25	34			30	40			155	155	150	150					140	160	140	160					NA	NA	80	70									NA	NA	90	75					3	4
43	24	28			20	15			140	145	140	160					40	55	140	160					80	70	75	65									80	90	80	90					3	3
44	2	27	16	22	25	35	19.5	24.5	140	160	140	155	140	160	135	150	150	170	145	170	140	170	150	165	75	65	75	65	80	60	75	60			80	70	90	90	90	90	90	90	90	90	5	5	5	5	5
45	26	35	27		20	35	27.5		160	160	160	165	160	160			170	165	170	170	170	170			80	70	80	70	75	70	70	70					90	90	90	90	80	80			4	4	5	5
46	22		33.5		20		28		140	160			145	155			150	170			155	170			70	60			70	65	70	65					65	80			60	80					4	5
47	8				3
48	25				66				155	140							150	130							65	70											70	70
49	12				20				130	140			150	165			145	140							80	80					75	65					90	90
50	30				13				90	90							110	140							NA	NA											NA	NA
51	65	54			62	43			165	170	160	160					170	160	170	165					80	80	80	80									80	80	80	80					5	5
52		23	16			20	14				150	155	150	150					170	170	170	165					85	75	80	75	75	70							90	90	90	90					5	4
53	24	23	22.5		22	28	15.5	25	170	145	170	155	170	150	165	150	160	135	165	130	165	150	170	150	80	80	75	80			85	80			80	70	80	80	90	80	90	85	90	90	5	3	5	5	5
54	26	26	29.5	15.5	15	22	31.5	32.5	155	165	155	165	160	165	145	150	165	170	165	170	160	175	150	155	80	70					80	60			45	40	90	90			80	85	80	80			5	5	5
55	23				35				155	150							155	140							90	75											90	85
56	36	30	20.3333	21	35	20	25.6667	25.5	150	140	160	150	150	150	155	160	160	135	170	150	170	140	175	155	75	70	75	70	70	70	70	75			80	60	75	85	75	80	75	80	85	80	5	3	5	4	5
57	15	20	15		3	13	14		140	35	150	30	150	30			150	45	150	35					80	80	80	80									60	50	55	50					4	3
58	14				10				170	170							170	170							80	70											90	90
59					11				150	155							165	170							80	90											90	90
60	23	24	35.6667	43	25	32	34.3333	40	155	165	150	160	140	155	165	170	165	170	170	170	160	175	175	175	75	75	85	75	80	80	75	75			80	70	85	90	90	90	75	80	85	90	3	4	4	5	5
61	13				15				135	150							150	135
62	23	15	16		17	20	15		150	165	150	160	160	165			170	170	170	170	170	170			60	55	60	60			70	60					80	80	80	80	85	75			5	5
63	16	25			12	33			150	145	140	130					170	120	170	135					80	75	80	70									75	75	70	70					4	3
64	14	22	25		25	20	20		155	170	165	165	160	165			135	170	155	175	155	175			75	75	75	70			70	70					90	90	90	90	90	90			5	5
65	14	31			20	27			165	165	165	160					165	160	175	160					80	85	80	80									85	80	85	80					4	4
66	12	20	20		12	25	23																																						5	5
67	14				10				135	165							135	170							80	75											90	85
68	16				16				95	155							85	140							65	70											60	65
69	16	22			20	25			150	165	150	165					160	170	165	170					75	65	70	65									75	85	85	85					5	5
70	14	21	20	22	20	12	21.5	30	150	150	165	165	155	160	165	160	150	180	170	170	170	170	170	170	70	75	70	75			70	60	80	75	70	75	65	60	65	65	85	85	90	90	5	5	5	5	5
71	27	39			30	38			170	170	170	170					170	170	170	170					90	70	90	70									90	85	90	80					5	5
72	35	42			30	30	37.5	35			145	160	140	155	135	160			145	165	160	165	160	180			70	60			85	80	80	75	85	85			90	90	90	90	90	90	4	5	4	5	4
73	25				18				150	160							170	170							75	75											75	80
74	22	26			25	24	18.5		150	150	150	150	150	145			160	150	160	140	155	135			80	80	75	70	80	80	80	80					60	75	75	75	70	80			4	5	5	5
75	23	14			32	15			150	140	145	135					135	135	140	135					75	75	70	70									85	80	85	80					4	4
76	19	14	11.6667	13	25	17	13.3333	13	155	165	155	160	170	170	155	165	175	170	170	170	170	170	170	180	80	75	80	75	80	80	75	75			65	75	90	90	90	90	90	90	90	90	5	5	5	5	5
77	20	16			25	15			135	130							135	125							60	70											60	65
78	22	36			20	45			155	120							170	110
79	16				10				160	170							160	170							70	65											80	90
80	24		34	34	20		39	37.5	160	165			165	165	170	170	150	170			175	175	180	180	80	80			80	80	80	80			80	80	80	90			90	90	90	90			5	5	5
81	15				15				135	150							170	145							65	70											80	80
82	14		34.5	38.5	17		38.5	40	165	165			170	170	160	165	170	170			175	170	180	180	70	65			70	75	75	70			75	60	85	85			90	90	90	90			5	5	5
83	12				10				155	155							140	170							60	60											85	90
84	29				17				140	165							140	160							80	50											60	80
85	32		38.6667	42.5	23		40.3333	50	150	160			165	165	170	170	170	155			175	175	180	180	80	70			80	70	85	85	90	90	85	80	90	90			85	85	90	90			5	5	5
86	23	33	45.3333	52	15	35	40.6667	50	150	145	150	140	150	150	145	155	160	125	170	120	165	145	165	145	80	80	85	85	80	80	85	80	80	80	75	75	90	85	85	80	90	85	90	90	5	5	5	5
87	13	24	30		10	25	23		120	130	130	160					125	150	155	165	155	165			50	60	75	75			80	80					60	65	85	80	80	80			5	5
88	25				20	25			140	155							150	160							80	70											70	85
89	21				27		16.6667	19.5	150	170	165	175	170	170	170	175	150	170	165	180	165	175	155	170	75	70	80	75			75	70	65	65	70	50	85	85	90	90	90	75	90	80	4	5	5	5	5
90	21				26				145	150							165	155							80	70											70	75
91	12				8				165	135							170	135							75	85											90	90
92	22				22				100	105							105	100							85	80											75	80
93					30				130	160							145	170							75	70											90	90
94	30				32				150	165							150	170							75	70											90	90
95					12				160	160							175	170							75	70											90	90
96	20		20.6667	24	22		25	22	160	165			170	170	170	170	175	175			180	180	170	170	75	70			70	75	75	70	70	70	75	70	90	90			90	90	90	80			5	5	5
97	15	12	10		5	15	10		145	160	140	160					135	170	145	170	150	180			75	75	80	75	80	75							70	80	80	90	90	90			5	5
98			31.6667			25	31.6667	27	170	170	175	175	165	170	160	165	170	170	180	175	180	180	180	180	80	70	85	75	85	70	85	70	80	70	75	65	90	90	90	85	90	90	90	90	5	5	5	5	5
[truncated: 45 more columns]
